# Supplementary material for: Development of a biomimetic liver tumor-on-a-chip model based on decellularized liver matrix for toxicity testing
Source: Royal Society of Chemistry journal article supplement (doi:10.1039/c8lc00852c), 2018-01-01
Supplement: c8lc00852c1.pdf [file c8lc00852c1.pdf]

## Supporting Information

### Development of a biomimetic liver tumor-on-a-chip model based on decellularized liver matrix for toxicity testing

Siming Lu <sup>1,2,3</sup>, Fabio Cuzzucoli <sup>1,2,3,4</sup>, Jing Jiang <sup>1,2</sup>, Li-guo Liang <sup>1,2,3</sup>, Yiming Wang <sup>1,2,3</sup>, Mengqi Kong <sup>1,2,3</sup>, Xin Zhao <sup>5</sup>, Wenguo Cui <sup>6</sup>, Jun Li <sup>1,2#</sup>, ShuQi Wang <sup>1,2,3#</sup>

<sup>1</sup> *State Key Laboratory for Diagnosis and Treatment of Infectious Diseases, First Affiliated Hospital, Zhejiang University School of Medicine, Hangzhou, Zhejiang Province, 310003, China*

<sup>2</sup> *Collaborative Innovation Center for Diagnosis and Treatment of Infectious Diseases, Hangzhou, Zhejiang Province, 310003, China*

<sup>3</sup> *Institute for Translational Medicine, Zhejiang University, Hangzhou, Zhejiang Province, 310029, China*

<sup>4</sup> *University of Waterloo, 200 University Avenue West, Waterloo, ON, N2L 3G1, Canada*

<sup>5</sup> *Department of Biomedical Engineering, the Hong Kong Polytechnic University, Hong Kong, China*

<sup>6</sup> *Shanghai Institute of Traumatology and Orthopaedics, Shanghai Key Laboratory for Prevention and Treatment of Bone and Joint Disease, Ruijin Hospital, Shanghai Jiao Tong University School of Medicine, 197 Ruijin 2nd Road, Shanghai 200025, P.R. China*

# Corresponding author. E-mail: [lijun2009@zju.edu.cn](mailto:lijun2009@zju.edu.cn); [shuqi@zju.edu.cn](mailto:shuqi@zju.edu.cn)

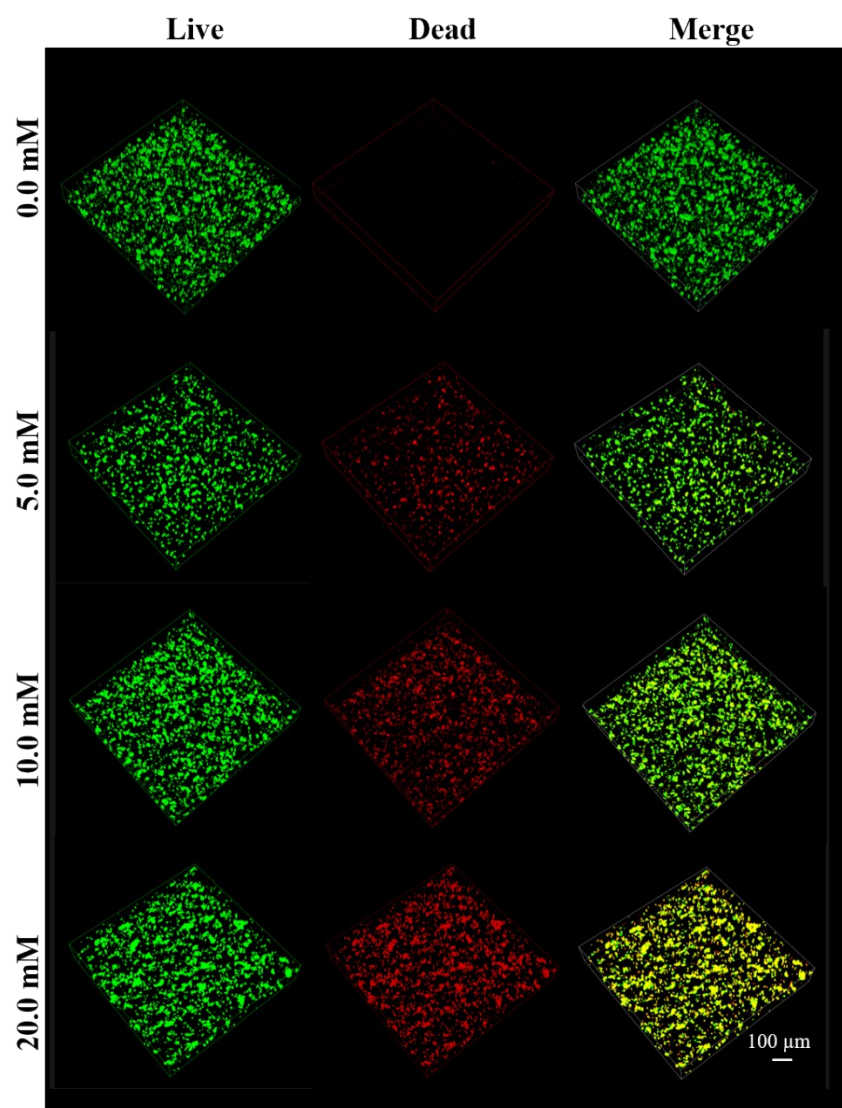

**Fig. S1** Live/dead staining of HepG2 cells in the 2:3 DLM-GelMA hydrogels after adding 0.0, 5.0, 10.0, and 20.0 mM of acetaminophen after 24h. Live cells were stained in green, and dead cells are stained in red. The yellow color represented the overlaid images of live and dead cells.

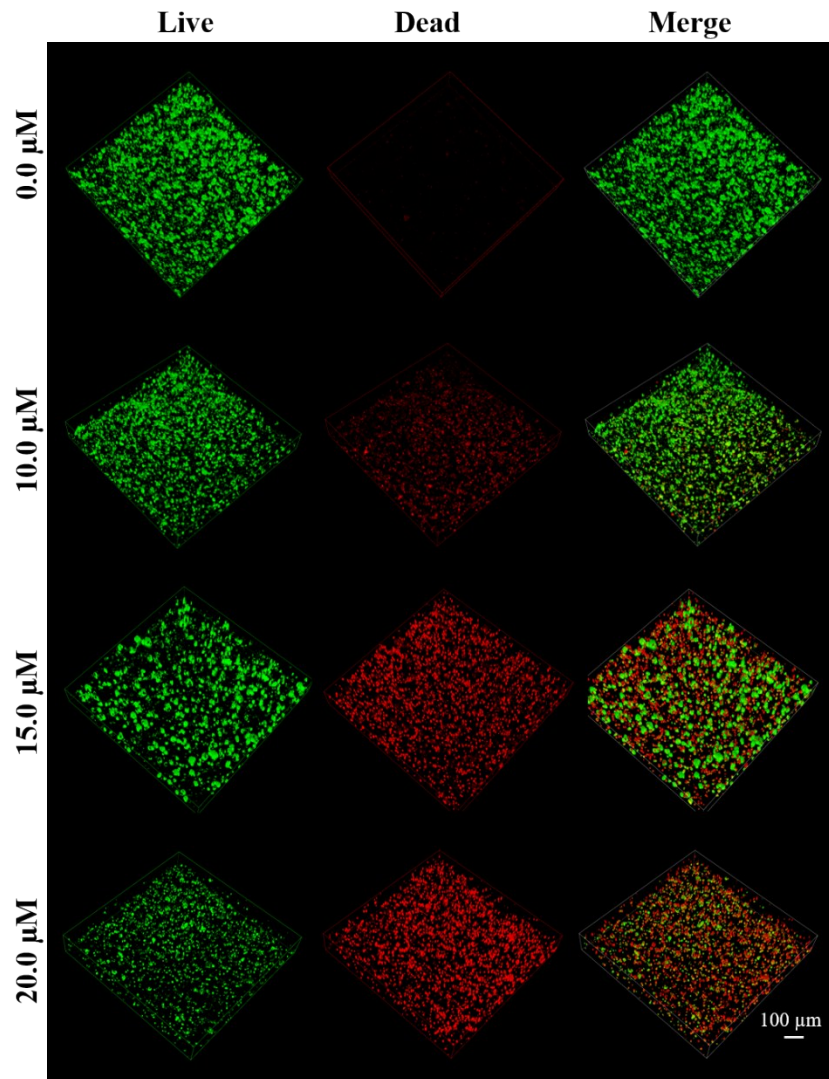

**Fig. S2** Live/dead staining of HepG2 cells in the 2:3 DLM-GelMA hydrogels after adding 0.0, 10.0, 15.0, and 20.0  $\mu\text{M}$  of sorafenib after 24h. Live cells were stained in green, and dead cells are stained in red. The yellow color represented the overlaid images of live and dead cells.

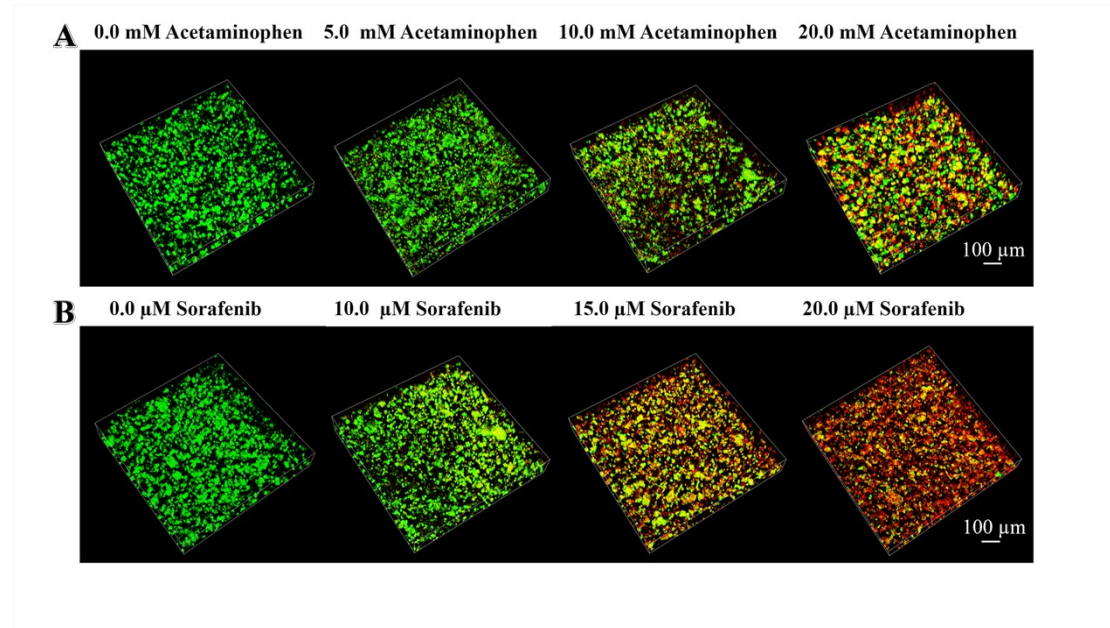

**Fig. S3** Evaluation of acetaminophen/sorafenib induced toxicity using the tumor-on-a-chip platform with embedded 3D HepG2-laden GelMA. (A) Live/dead staining showing acetaminophen (0.0, 5.0, 10.0 and 20.0 mM) treatment of HepG2 embedded in GelMA for 24 h. Scale bar: 100  $\mu\text{m}$ . (B) Live/dead staining showing sorafenib (0.0, 10.0, 15.0 and 20.0  $\mu\text{M}$ ) treatment of HepG2 embedded in GelMA only for 24 h. Scale bar: 100  $\mu\text{m}$ .

**Table S1.** Calculation of collagen concentration in native liver, DLM solution and DLM-UV light.

|                                                                          | Native liver      | DLM solution        | DLM-UV light       |
|--------------------------------------------------------------------------|-------------------|---------------------|--------------------|
| Sample Volume ( $\mu\text{L}$ )                                          | 400               | 400                 | 400                |
| HYP ( $\mu\text{g}$ )                                                    | 3.480 $\pm$ 0.586 | 8.018 $\pm$ 2.819   | 8.213 $\pm$ 1.317  |
| Collagen ( $\mu\text{g}$ )                                               | 25.058 $\pm$ 4.22 | 57.731 $\pm$ 20.297 | 59.135 $\pm$ 9.486 |
| Dry weight (mg)                                                          | 3                 | 0.4                 | 0.4                |
| Dry Weight Collagen ( $\mu\text{g}/\text{mg}$ )                          | 8.35 $\pm$ 2.44   | 144.33 $\pm$ 87.89  | 147.84 $\pm$ 41.07 |
| Total Collagen in the sample ( $\mu\text{g}$ )                           | 25.1              | 57.7                | 59.1               |
| Concentration of Collagen in live tissues ( $\mu\text{g}/\mu\text{L}$ )  | 0.06275           | 0.14433             | 0.14784            |
| Concentration of Collagen from DLM in Chip ( $\mu\text{g}/\mu\text{L}$ ) | N/A               | N/A                 | 0.0591             |

**Table S2.** Preparation of different volume ratios of DLM-GelMA

| DLM-GelMA      | DLM ( $\mu\text{L}$ ) | 10 wt% GelMA ( $\mu\text{L}$ ) | PI (g) |
|----------------|-----------------------|--------------------------------|--------|
| GelMA only     | 0                     | 1,000                          | 0.01   |
| 1:9 DLM-GelMA  | 100                   | 900                            | 0.01   |
| 1:4 DLM-GelMA  | 200                   | 800                            | 0.01   |
| 3:7 DLM-GelMA  | 300                   | 700                            | 0.01   |
| 2:3 DLM-GelMA  | 400                   | 600                            | 0.01   |
| 1: 1 DLM-GelMA | 500                   | 500                            | 0.01   |

Abbreviations: PI = photoinitiator

**Table S3.** Dimensions of liver tumor-on-a-chip

| Dimensions                                           | Top Layer          | Bottom Layer       |
|------------------------------------------------------|--------------------|--------------------|
| Width of chamber ( $w$ )                             | 5 mm               | 5 mm               |
| Length of chamber ( $l$ )                            | 15 mm              | 15 mm              |
| Height of chamber ( $h$ )                            | 0.5 mm             | 1 mm               |
| Volume                                               | 45 mm <sup>3</sup> | 60 mm <sup>3</sup> |
| Diameter of microchannel                             | 1.5 mm             | 1.5 mm             |
| Inner diameter of tubes                              | 0.5 mm             | 0.5 mm             |
| Outer diameter of tubes and of device inlets/outlets | 2 mm               | 2 mm               |

**Table S4.** Quantification of collagen, glycosaminoglycans (GAG), HGF and bFGF in the DLM solution before and after UV light exposure and in the native liver.

| Parameter                                      | Native liver      | DLM solution       | DLM-UV light       |
|------------------------------------------------|-------------------|--------------------|--------------------|
| Collagen ( $\mu\text{g}/\text{mg}$ dry weight) | $8.35 \pm 1.41$   | $144.33 \pm 50.74$ | $147.84 \pm 23.71$ |
| GAG ( $\mu\text{g}/\text{mg}$ dry weight)      | $195.23 \pm 5.33$ | $499.16 \pm 14.02$ | $479.42 \pm 28.77$ |
| HGF ( $\text{pg}/\text{mg}$ dry weight)        | $6.70 \pm 0.08$   | $4.27 \pm 0.05$    | $4.37 \pm 0.04$    |
| bFGF ( $\text{pg}/\text{mg}$ dry weight)       | $5.29 \pm 0.09$   | $4.58 \pm 0.11$    | $4.07 \pm 0.02$    |

Abbreviations: GAG = glycosaminoglycan; HGF = hepatocyte growth factor; bFGF = basic fibroblast growth factor

**Table S5.** Measurement of Young's modulus and pore size for different volume ratios of DLM-GelMA

|               | Young's modulus (kPa) | Pore size ( $\mu\text{m}$ ) |
|---------------|-----------------------|-----------------------------|
| GelMA only    | $19.56 \pm 1.30$      | $41.28 \pm 1.79$            |
| 1:9 DLM-GelMA | $21.78 \pm 0.45$      | $56.74 \pm 5.91$            |
| 1:4 DLM-GelMA | $19.41 \pm 0.73$      | $72.07 \pm 4.81$            |
| 3:7 DLM-GelMA | $19.47 \pm 1.45$      | $89.87 \pm 6.27$            |
| 2:3 DLM-GelMA | $16.91 \pm 0.54$      | $100.34 \pm 8.56$           |
| 1:1 DLM-GelMA | $19.14 \pm 0.70$      | $101.54 \pm 5.97$           |
